# Supplementary material
Source: PubMed Central journal article supplement (PMC9729886)
Supplement: ajcr0012-5342-f5.pdf [file ajcr0012-5342-f5.pdf]

BRAF targeting agents in advanced ATC: a multi-institutional retrospective study

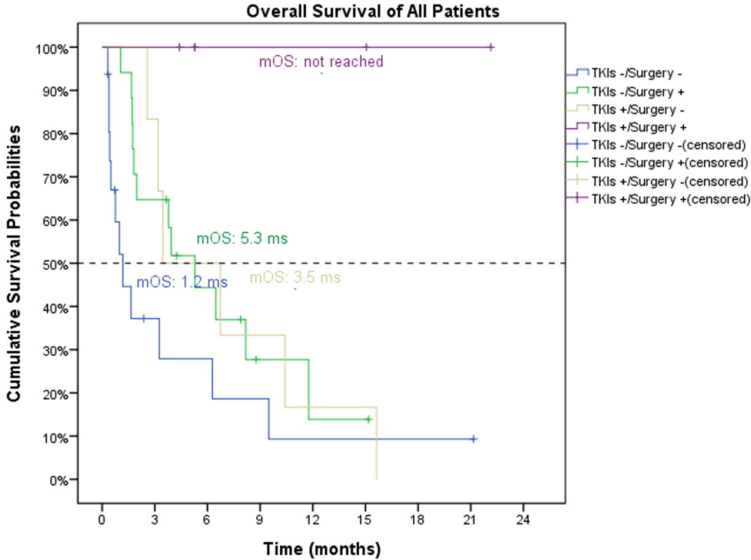

Figure S1. The overall survivals for ATC patients based on the surgery and use of dabrafenib and trametinib.
